# Supplementary material
Source: PubMed Central journal article supplement (PMC193596)

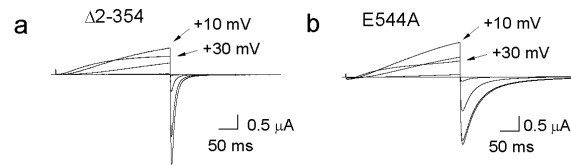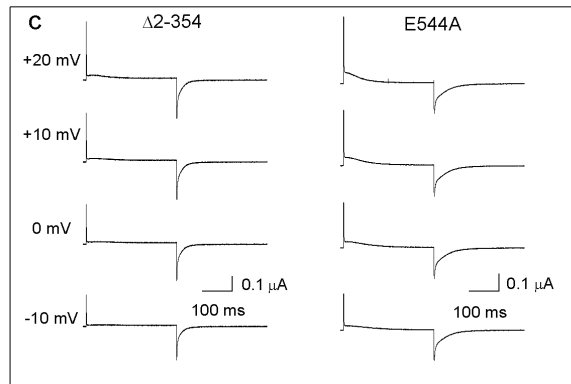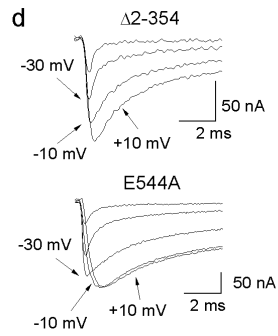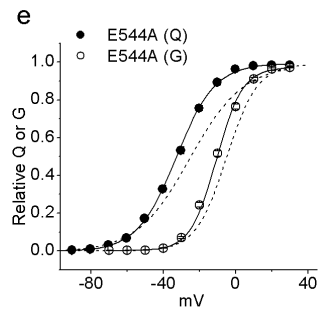

Supplement: pnas_1832721100_2.pdf [file pnas_1832721100_2.pdf]
